# Supplementary material
Source: PubMed Central journal article supplement (PMC6810858)
Supplement: NIHMS1537580-supplement-1.pdf [file NIHMS1537580-supplement-1.pdf]

Figure S1

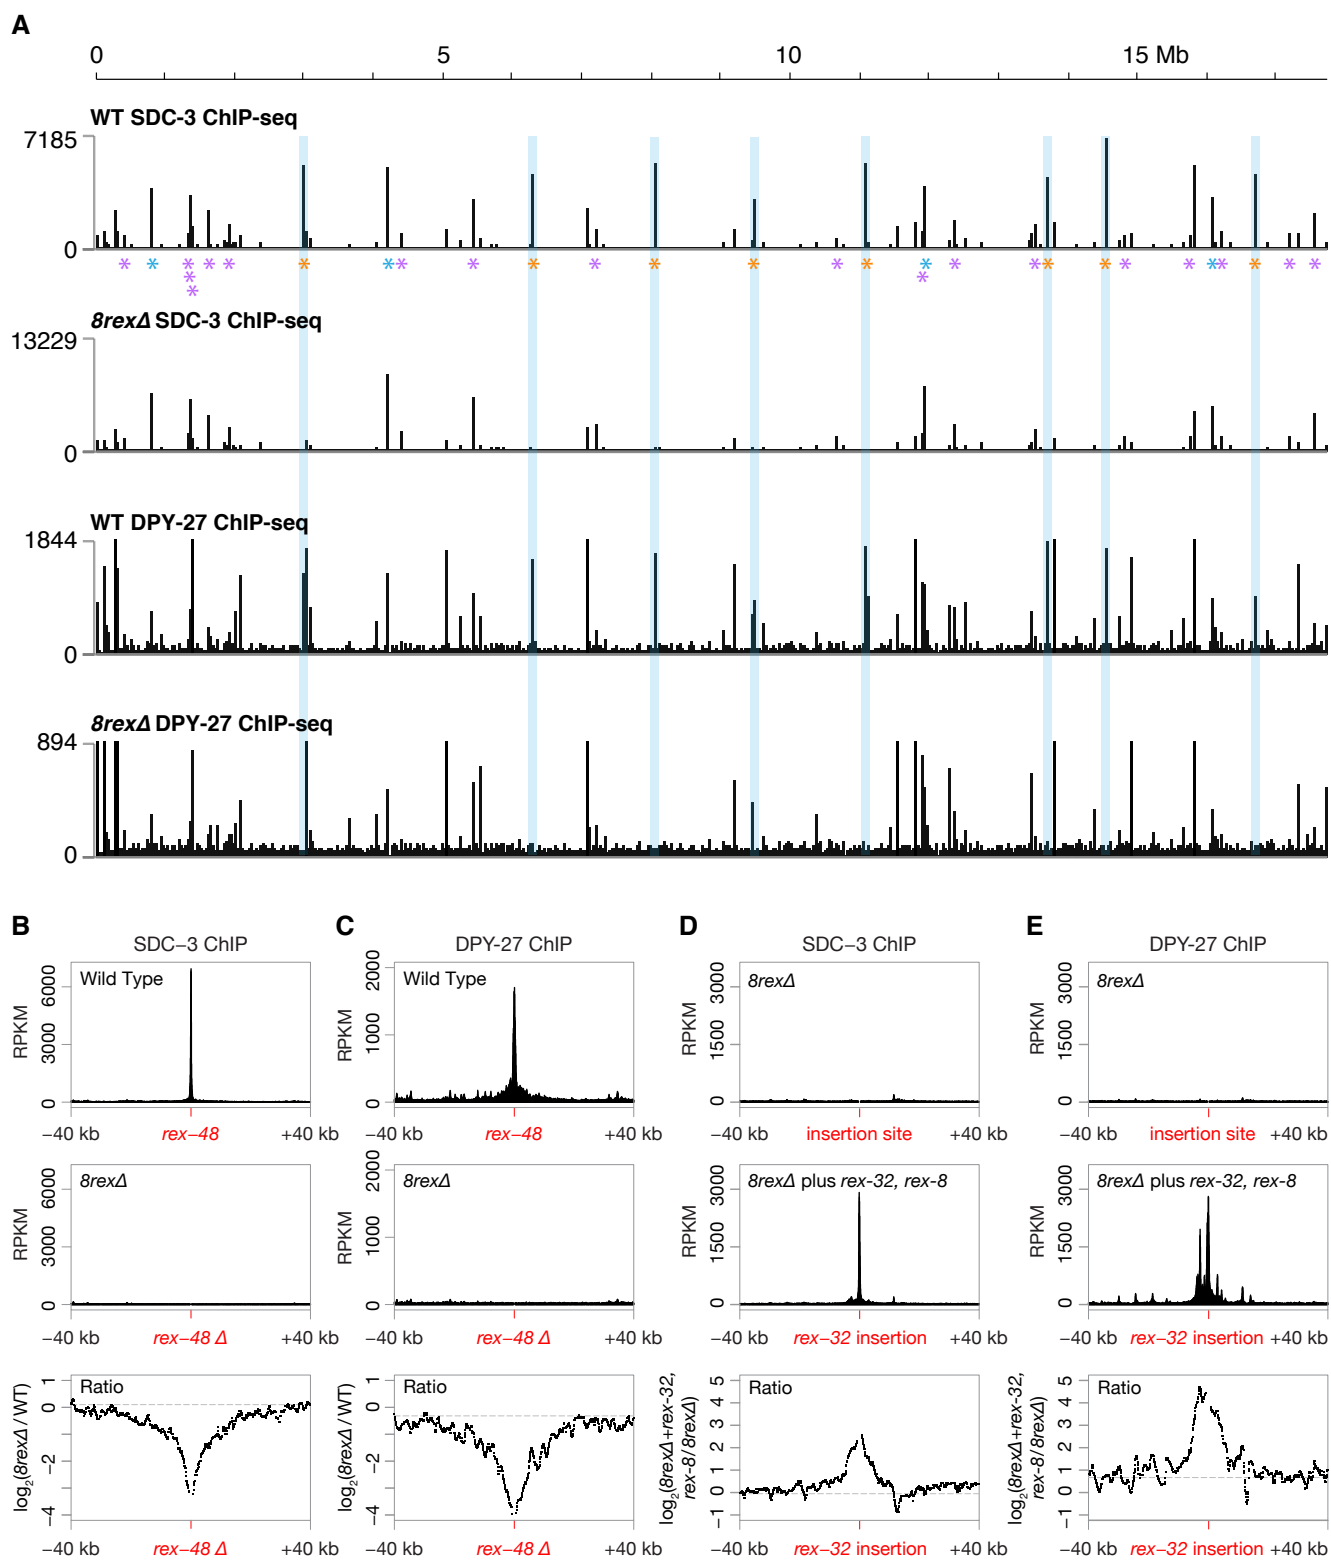

**Figure S1. DCC Binding at Deleted *rex* Sites Is Abolished But Most DCC Binding on X Persists, Related to Figure 1**

(A) SDC-3 and DPY-27 ChIP-seq profiles on X chromosomes of wild-type and *8rexΔ* embryos. Plots are scaled based on the binding at four strong *rex* sites that were not deleted (*rex-40*, *rex-23*, *rex-16*, and *Prex-30*, blue asterisks left to right, respectively). Other *rex* sites that were not deleted are marked with purple asterisks. Blue stripes and orange asterisks highlight the locations of the eight deleted *rex* sites.

(B and C) SDC-3 and DPY-27 ChIP-seq RPKM (reads per kilobase of transcript per million mapped reads) in the 80 kb region surrounding *rex-48* in wild-type embryos (top) and surrounding the *rex-48* deletion in *8rexΔ* embryos (middle). Red ticks show the location of the 408 bp *rex-48* deletion. Bottom plots display the  $\log_2$  ratio of ChIP-seq reads in *8rexΔ* versus wild-type embryos. Ratios were not calculated for the deleted region. Gray dashed lines show the median ratio of signal between genotypes for the entire X chromosome. Binding of SDC-3 and DPY-27 was reduced immediately adjacent to the deletions but returned to wild-type levels within 20 kb.

(D and E) SDC-3 and DPY-27 ChIP-seq RPKM in the 80 kb region surrounding the location of the inserted *rex-32* in *8rexΔ* and in *8rexΔ* plus *rex-32*, *rex-8* embryos. Red ticks show the location of the 592 bp *rex-32* insertion. As above, bottom plots show the  $\log_2$  ratio of DCC binding between genotypes. Binding of SDC-3 and DPY-27 was increased immediately adjacent to the insertions but returned to wild-type levels within 15 kb.

Figure S2

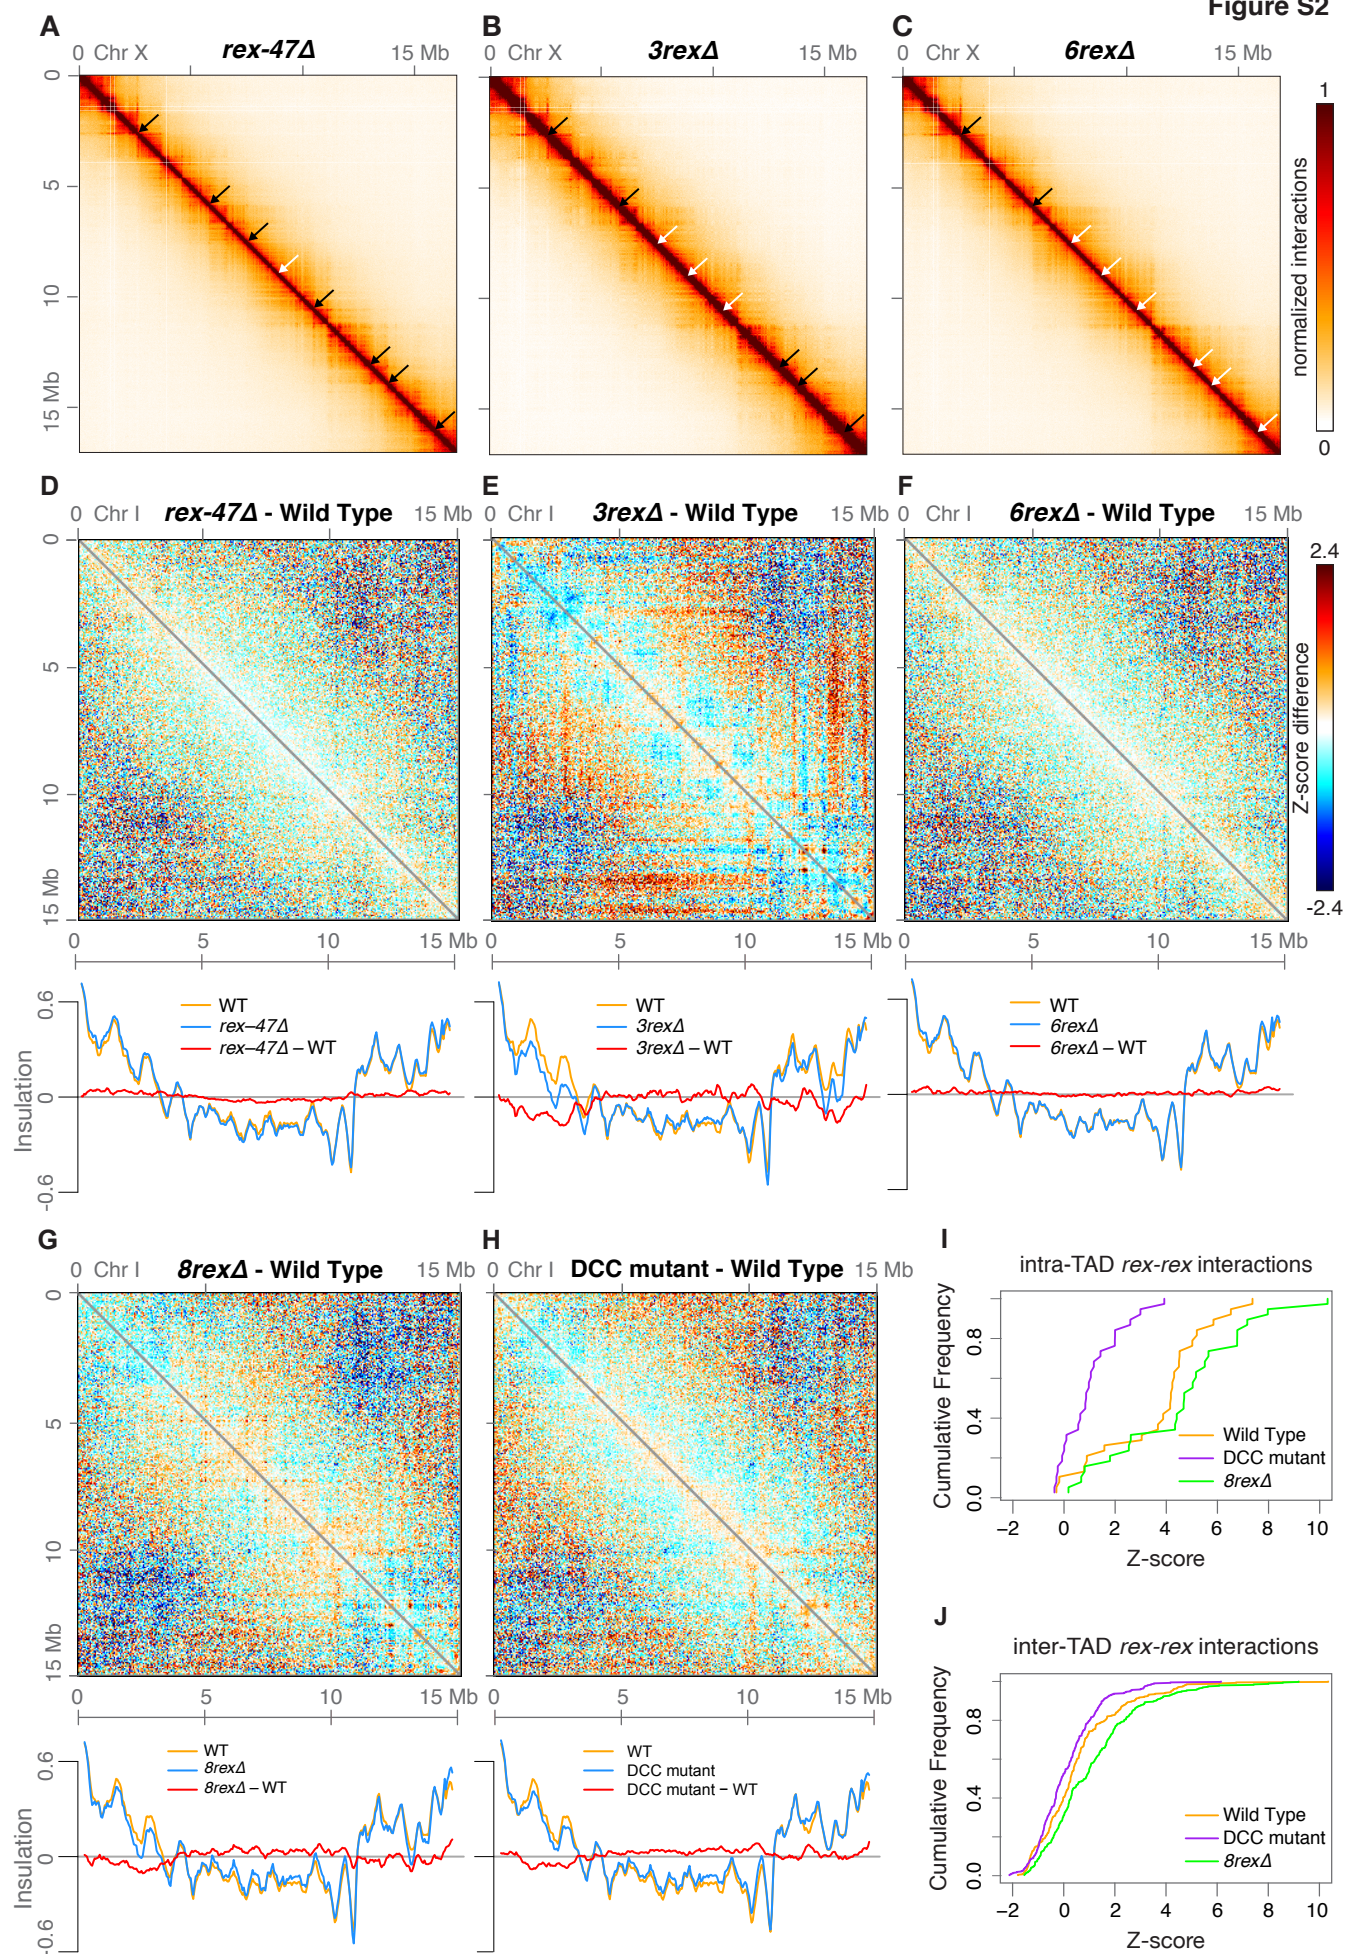

**Figure S2. *rex* Deletions Cause X-Specific Changes in Chromosome Structure, Related to Figure 1**

(A-C) X chromosome heatmaps binned at 20 kb show Hi-C interactions in *rex-47Δ*, *3rexΔ*, and *6rexΔ* embryos. White arrows mark the positions of deleted *rex* sites, and black arrows mark remaining DCC-dependent boundaries.

(D-H) Z-score subtraction heatmaps of chromosome I binned at 50 kb show increased (red) and decreased (blue) Hi-C interactions in four strains with different numbers of *rex* deletions and in a DCC mutant strain [*sdcc-2(y93, RNAi)*] compared to the wild-type strain. Lower plots show insulation scores across chromosome I in *rex* deletion or DCC mutant (blue) and in wild-type (orange) strains and the insulation score difference between genotypes (red).

(I and J) Cumulative frequency of interaction Z-scores for interactions between *rex* sites within the same TAD (I) or between *rex* sites in separate TADs (J). In *8rexΔ* embryos, higher interactions occur between *rex* sites located across deleted boundaries and between *rex* sites within regions defined as TADs on the wild-type X. Only the 22 non-boundary *rex* sites with the highest SDC-3 binding were analyzed, and only interactions between sites within 4 Mb were included.

Figure S3

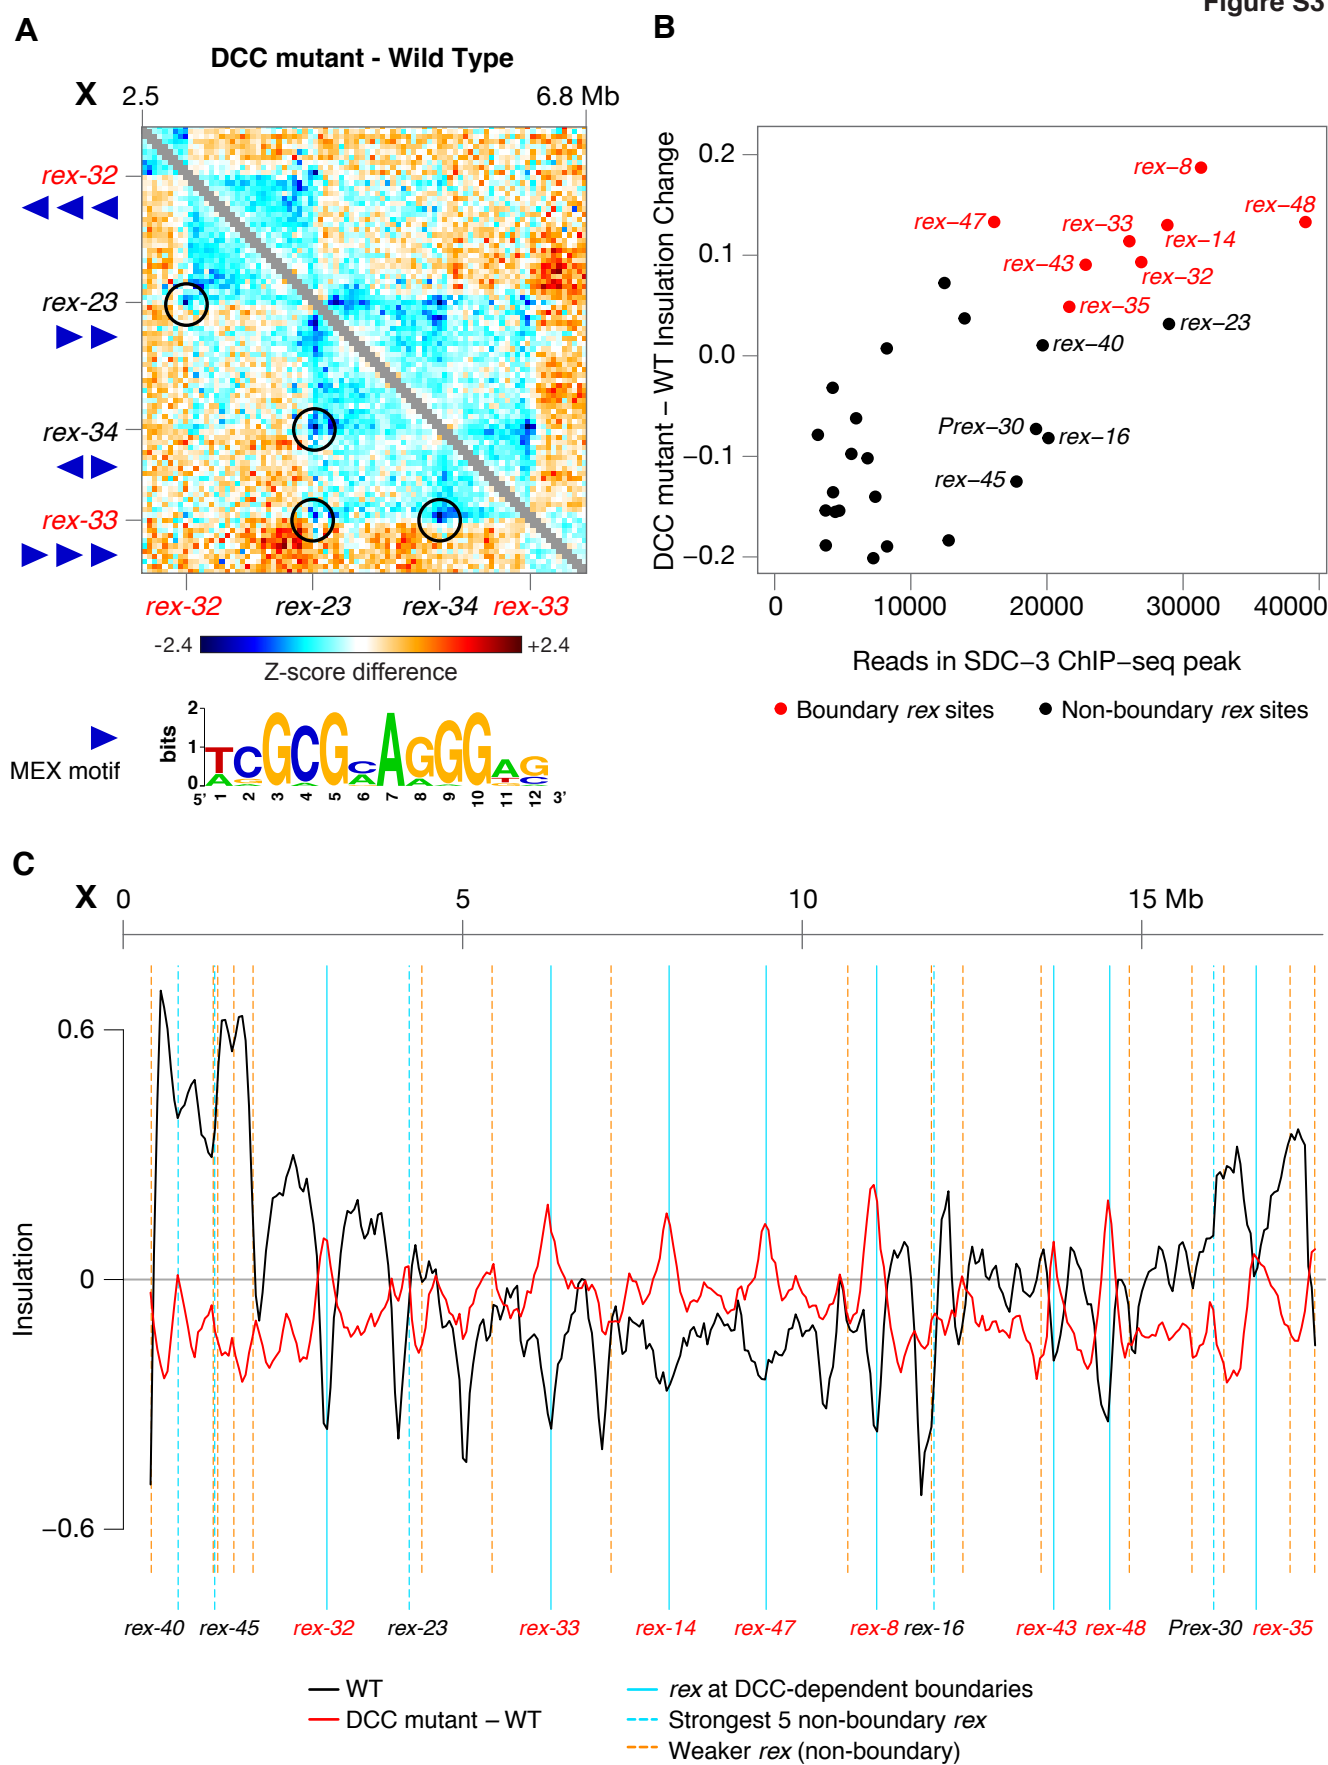

**Figure S3. Only High-Occupancy *rex* Sites Establish TAD Boundaries, Related to Figure 1**

(A) Examples showing that *rex* sites interact regardless of the orientation in these sites of known X-enriched motifs (MEX) important for DCC binding. Z-score subtraction heatmap of a portion of the X chromosome shows increased (red) and decreased (blue) interactions in DCC mutant versus wild-type embryos. Circles mark DCC-dependent interactions among four *rex* sites. Loss of a specific interaction in DCC mutants is reflected in a blue corner peak. For each *rex* site, blue triangles show the orientations of MEX motifs with a score less than -12 (Jans et al., 2009). *rex-23* (plus strand motifs) interacts with sites that have minus strand motifs (*rex-32*), plus strand motifs (*rex-33*), or both (*rex-34*). *rex-34* (both orientations) also interacts with *rex-23* (plus strand motifs).

(B) Correlation between insulation score change and DCC binding. For each of the 30 highest-occupancy *rex* sites, the insulation score difference in DCC mutant versus wild-type strains is plotted against the level of SDC-3 binding. SDC-3 levels were calculated by summing ChIP-seq reads mapping within 200 bp of the summit. *rex* sites at DCC-dependent boundaries are colored red. Five *rex* sites have more binding than *rex-47* but do not create boundaries (*rex-23*, *rex-16*, *rex-40*, *Prex-30*, and *rex-45*).

(C) Insulation profile of X chromosomes in the wild-type strain and insulation profile difference between wild-type and DCC mutant strains. Insulation scores were calculated by summing interactions in a 250 kb sliding window. (Plots in all other figures used a 500-kb window.) All DCC-dependent boundaries (solid cyan lines) contain one of the 13 highest-occupancy *rex* sites. Five *rex* sites that have the same or more DCC binding as boundary *rex* sites (dotted cyan lines) are not at boundaries (not at local minima in the wild-type insulation profile, black line) but do show insulation changes in the DCC mutant (local maxima in the insulation profile difference, red line). That is, in DCC mutants, interactions between loci flanking these non-boundary *rex* sites increased compared to interactions across neighboring loci. Insulation score changes also occur at some *rex* sites of rank 14-30 (dotted orange lines).

Figure S4

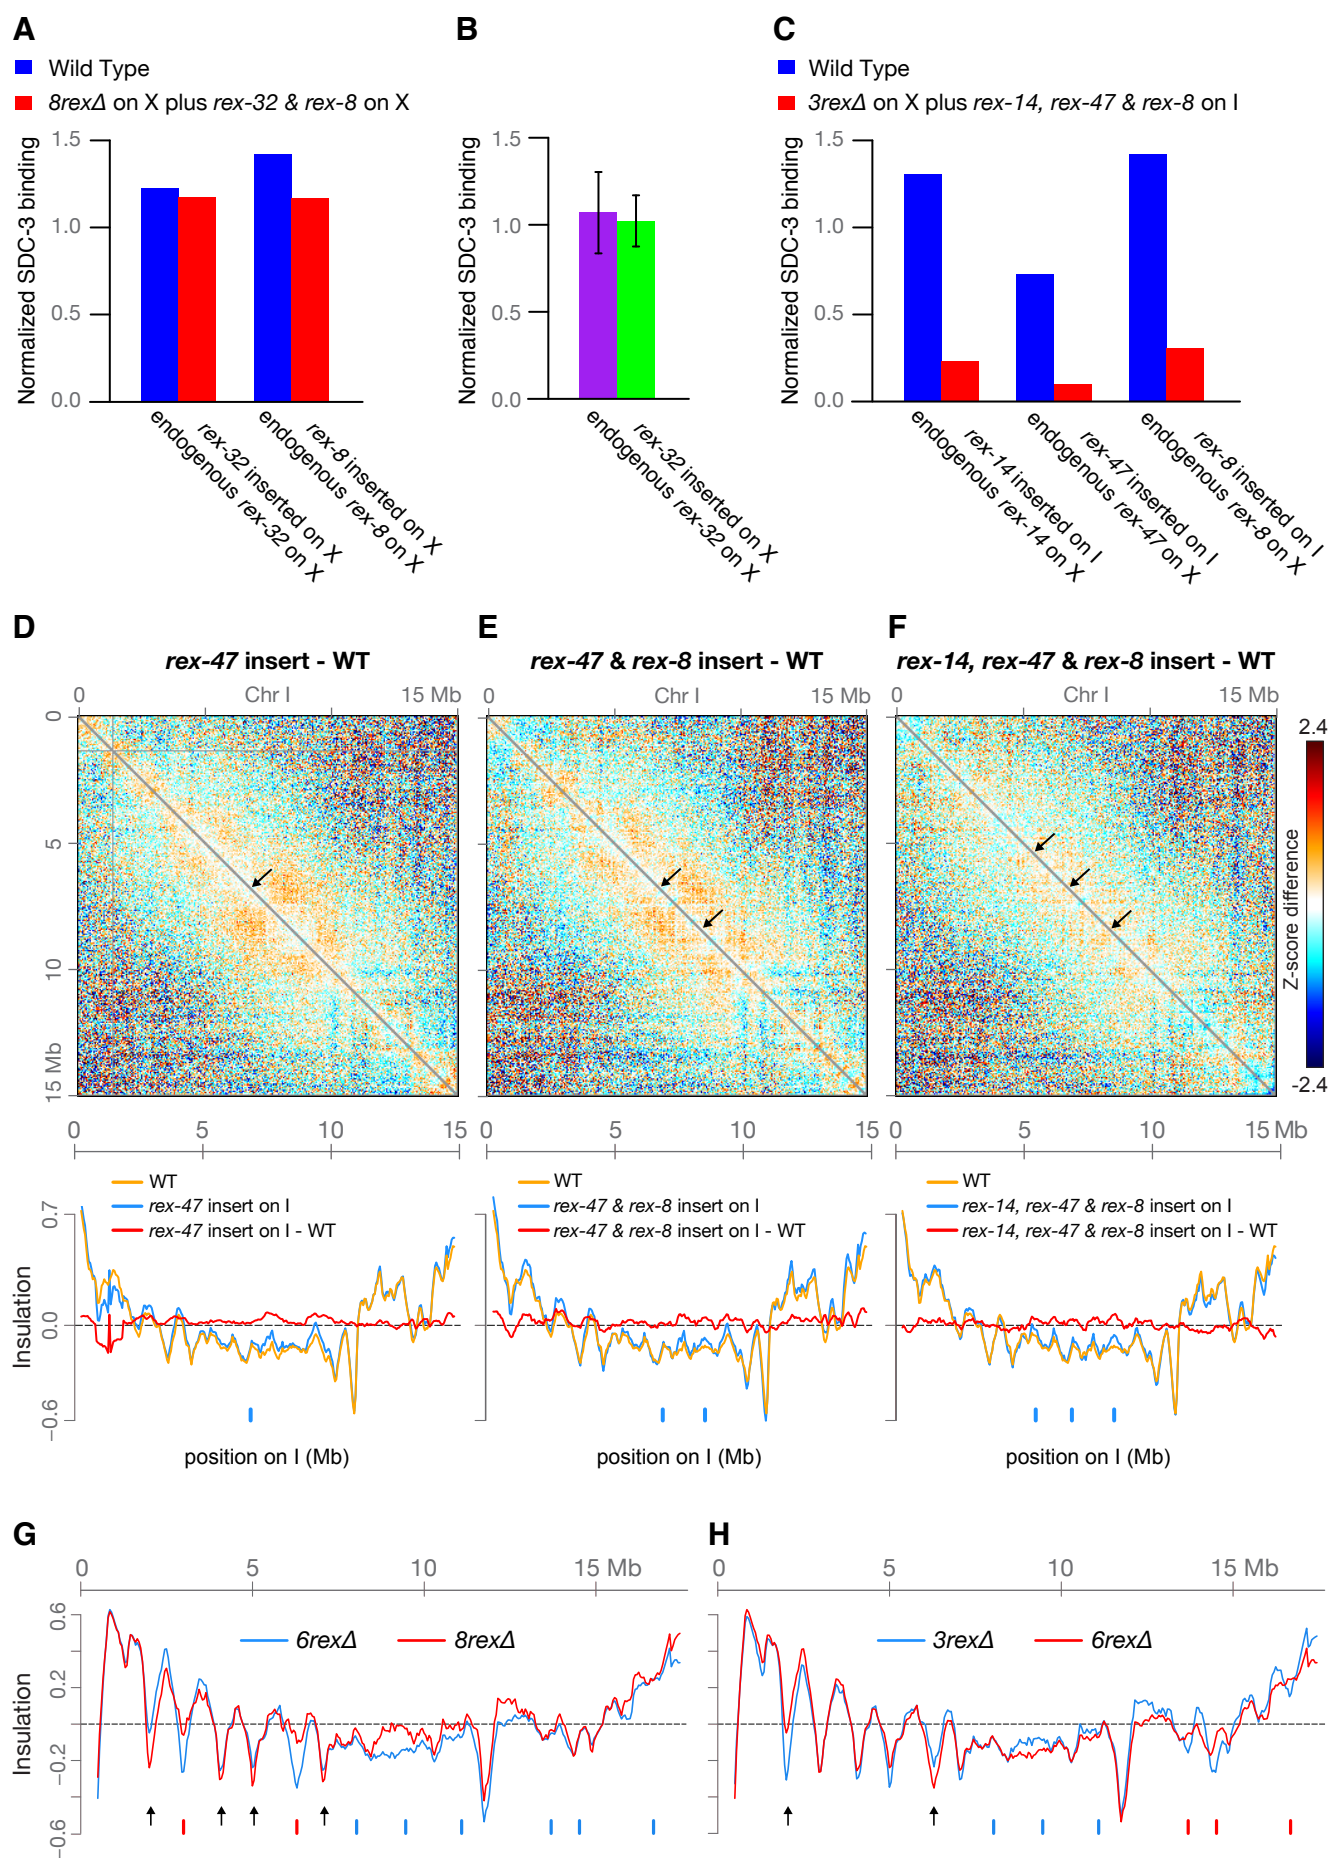

**Figure S4. *rex* Sites Inserted on Chromosome I Weakly Recruit the DCC But Do Not Create TAD Boundaries, Related to Figure 2**

- (A) SDC-3 binding at *rex-32* and *rex-8* inserted at new locations on X is similar to binding at the endogenous sites. Binding at *rex-32* and *rex-8* was normalized to the average binding at four strong non-boundary *rex* sites within the same dataset (*rex-40*, *rex-23*, *rex-16*, and *Prex-30*). Binding was calculated by summing ChIP-seq reads mapping within 200 bp of the summit.
- (B) SDC-3 binding at *rex-32* inserted at 15.5 Mb on the wild-type X chromosome is equivalent to binding at the endogenous *rex-32* site as measured by ChIP-qPCR. Binding was normalized to the binding at five strong *rex* sites (*rex-32*, *rex-8*, *rex-16*, *rex-48*, and *rex-35*). Error bars show standard deviation of three biological replicates.
- (C) ChIP-seq experiments show that SDC-3 binding at three *rex* sites inserted on chromosome I is lower than binding at the endogenous sites on X. Binding was calculated and normalized as in (A).
- (D-F) Z-score subtraction heatmaps binned at 50 kb show increased (red) and decreased (blue) Hi-C interactions in strains with one, two, or three *rex* sites inserted on chromosome I of the *3rexΔ* strain. This strain lacked the sites on X to allow unique mapping of reads to the new insertion locations. Arrows mark positions of inserted *rex* sites. *rex* insertions have no effect on chromosome I structure. Plots (below) show insulation scores across chromosome I in *rex* insertion (blue) and wild-type (orange) strains and the insulation score difference between genotypes (red). Chromosome I data used as the wild-type reference were from the strain carrying the *3rexΔ* X chromosome.
- (G) Insulation profiles comparing X chromosomes in *6rexΔ* and *8rexΔ* strains. Blue ticks show *rex* sites deleted in both mutants, and red ticks show *rex* sites deleted only in the *8rexΔ* strain. Boundaries adjacent to the *rex* sites deleted only in the *8rexΔ* strain are strengthened (arrows).
- (H) Insulation profiles comparing X chromosomes in *3rexΔ* and *6rexΔ* strains. Blue ticks show *rex* sites deleted in both mutants and red ticks show *rex* sites deleted only in *6rexΔ*. Insulation scores change at boundaries far from the deleted boundaries (arrows).

Figure S5

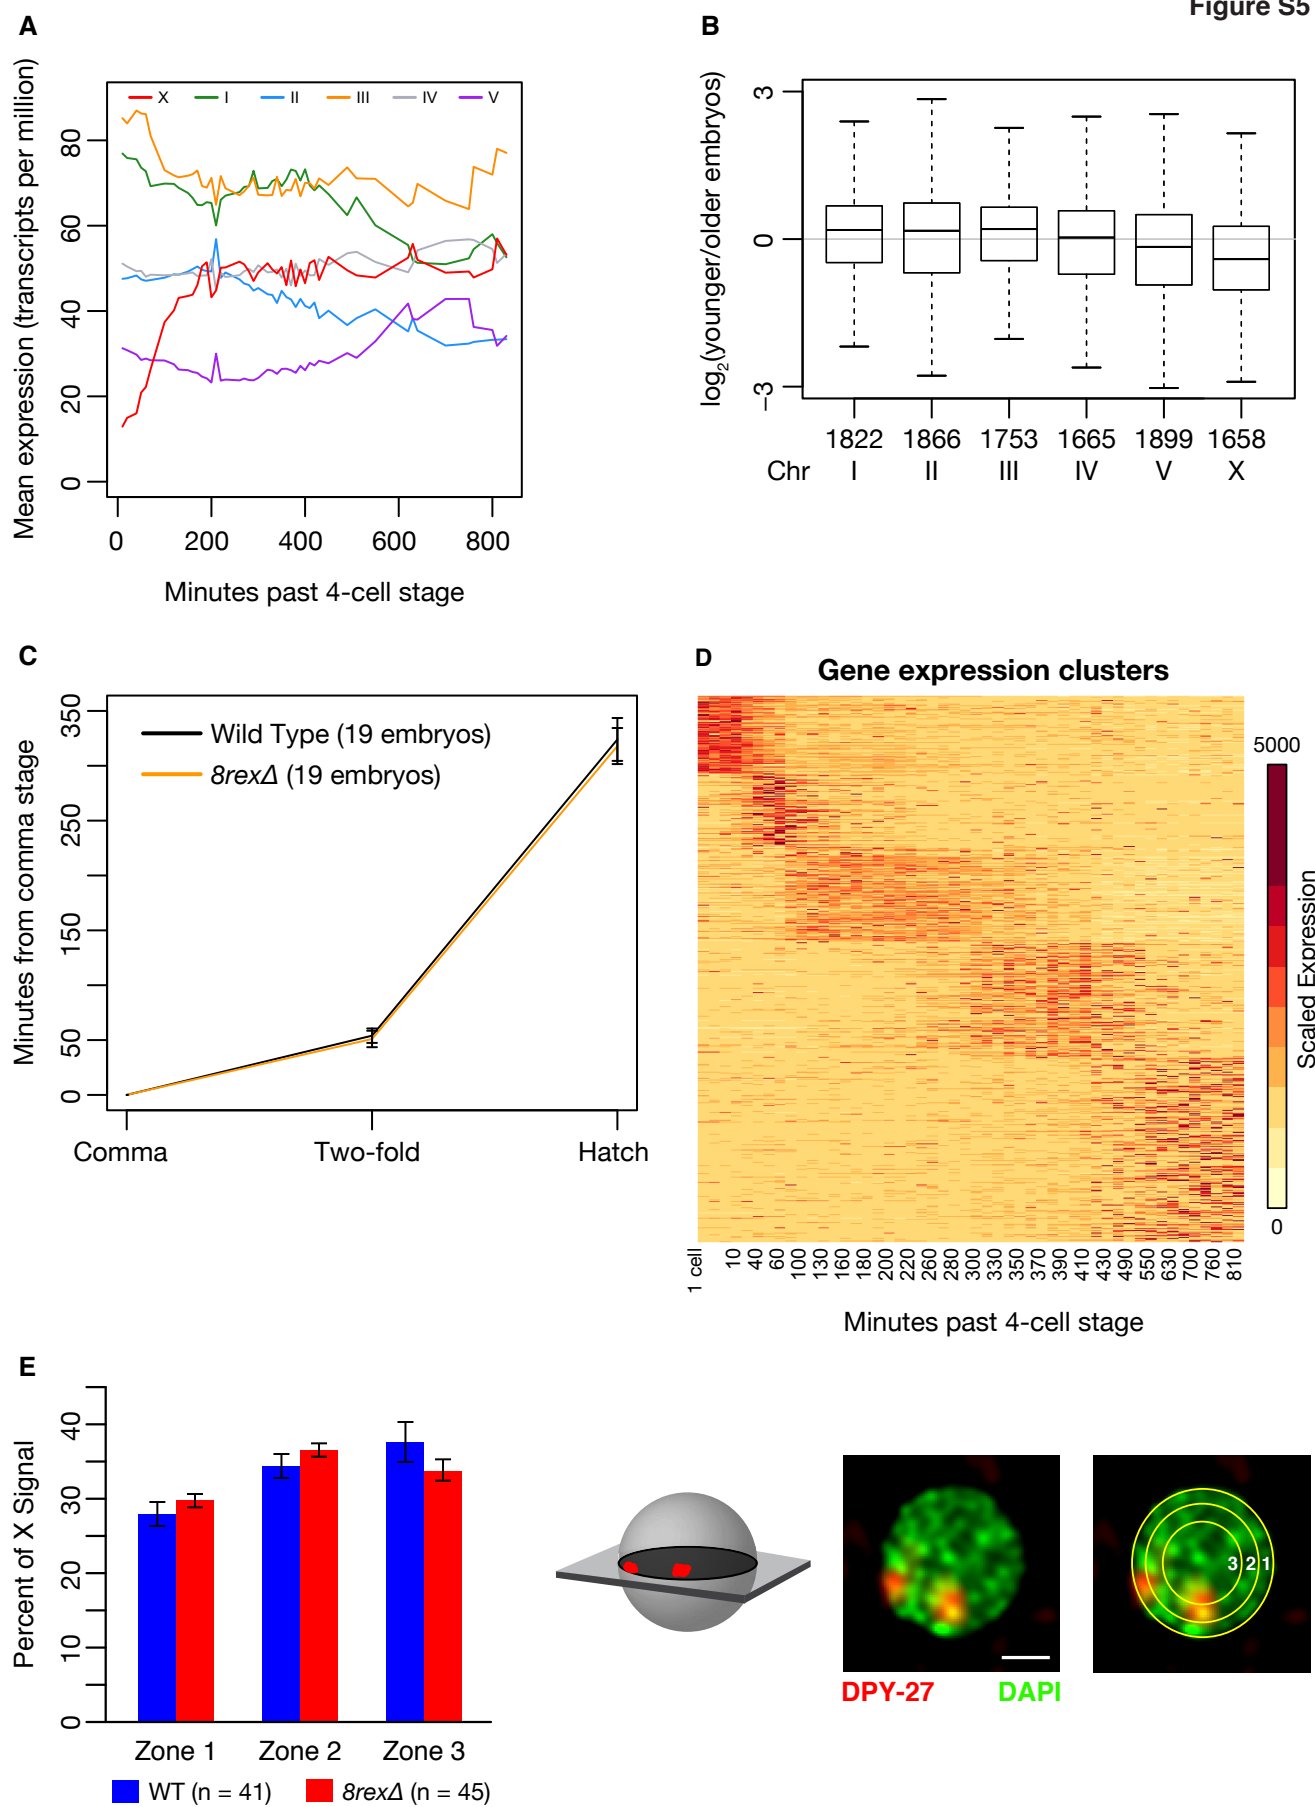

**Figure S5. Analysis for Matching Age Distribution of Embryo Populations, Related to Figure 3**

(A) Average expression from RNA-seq data (Hashimshony et al., 2015) of all the genes on each chromosome plotted at each time point during embryogenesis.

(B) Chromosome-by-chromosome comparison of gene expression in younger versus older wild-type embryos. Two replicates are included for each age. Because X chromosome silencing is gradually lost during early development, genes on X have lower expression in the younger population.

(C) The average time for development from comma stage to two-fold stage and then to hatching is equivalent in wild-type and *8rexΔ* embryos. Error bars show standard deviation.

(D) Expression for genes whose transcript levels change during development. Using data from (Hashimshony et al., 2015), we selected genes that have >1 transcript per million at any measured time point during embryogenesis and also change at least 20-fold in expression. We scaled each gene's expression by subtracting its mean and dividing by its standard deviation. The genes were divided into five groups by k-means clustering.

(E) X chromosome radial positioning is similar in nuclei of wild-type and *8rexΔ* embryos. (right) X chromosomes were stained with DPY-27 antibody (red) and DNA was stained with DAPI (green). For each nucleus, the Z section with the highest DPY-27 signal was selected. The nucleus was divided into three concentric zones of equal area, and the percentage of DPY-27 signal in each zone was calculated. (left) The graph shows the average percentage of X in each zone for wild-type and *8rexΔ* nuclei. Error bars show SEM. Scale bar is 1  $\mu$ m.

Figure S6

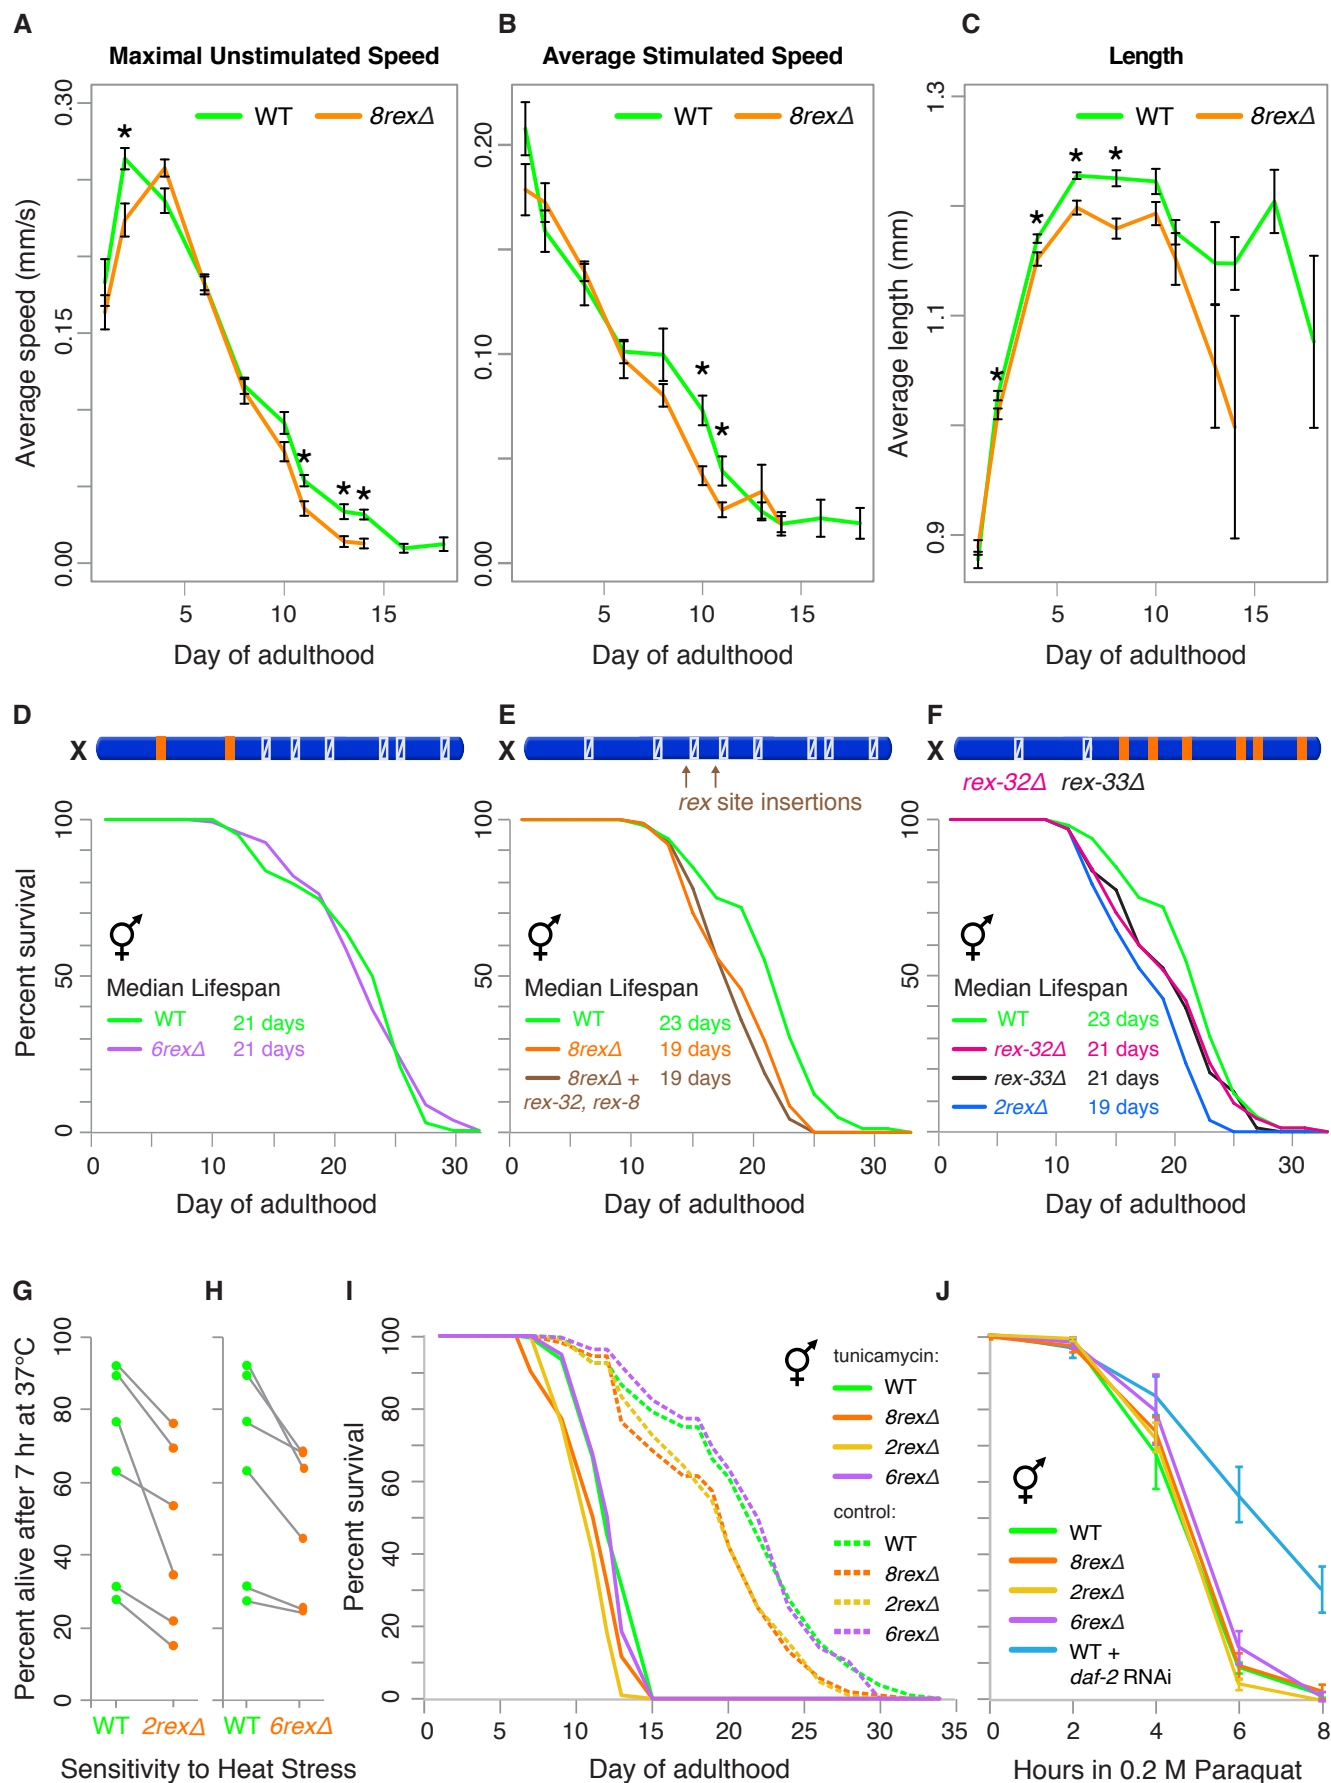

**Figure S6. Shortened Lifespan, Accelerated Aging, and Reduced Thermotolerance of Hermaphrodites with *rex* Deletions, Related to Figure 5**

- (A) Maximal unstimulated movement of wild-type and *8rexΔ* hermaphrodites during aging. For each genotype, the speed of 50 worms on each of eight plates was measured throughout adulthood. The measurement only included moving worms, not immobile or dead worms. We calculated the maximum speed of worms on each plate and plotted the mean  $\pm$  SEM of eight plates. Asterisks indicate significant differences ( $p < 0.05$ , t test). mm/s, millimeters per second
- (B) Average movement speed of wild-type and *8rexΔ* hermaphrodites in response to a mechanical stimulus (plate tap) during aging. Mean  $\pm$  SEM of all eight plates are plotted as in (A).
- (C) Body length of wild-type and *8rexΔ* hermaphrodites during aging. Mean  $\pm$  SEM of all eight plates are plotted as in (A).
- (D) Lifespans of wild-type versus *6rexΔ* hermaphrodites ( $p = 0.8$ , logrank test).
- (E) Lifespans of wild-type versus *8rexΔ* hermaphrodites ( $p < 0.0001$ ) or versus *8rexΔ* + *rex-32*, *rex-8* hermaphrodites ( $p < 0.0001$ ).
- (F) Lifespan of wild-type hermaphrodites versus *rex-32Δ* ( $p = 0.06$ ) or versus *rex-33Δ* ( $p = 0.03$ ) or versus *2rexΔ* ( $p < 0.0001$ ). For (D-F), values from replicate experiments are presented in Table S6.
- (G and H) Percent survival of wild-type and *2rexΔ* or *6rexΔ* day 1 adult worms after 7 hr at 37°C in each of six trials shows reduced thermotolerance in both *2rexΔ* and *6rexΔ* adults ( $p = 0.0135$  and  $p = 0.0183$ , respectively, paired t test). Fifty worms of each genotype were counted in each trial. A gray line links the measurements of the two genotypes in the same trial. Replicate experiments and statistics are in Table S4.
- (I) Lifespans were scored for wild-type, *8rexΔ*, *2rexΔ*, and *6rexΔ* hermaphrodites transferred on day 1 of adulthood to plates containing either 20 ng/ $\mu$ L tunicamycin to induce ER unfolded protein stress (solid lines) or DMSO as a control (dashed lines). Lifespans of all strains grown on tunicamycin were reduced. As in control experiments, lifespans of *8rexΔ* and *2rexΔ* adults grown on tunicamycin were shorter than those of wild-type and *6rexΔ* adults on tunicamycin. The degree of lifespan reduction was similar across all genotypes, indicating similar sensitivity to ER unfolded protein stress. Replicate experiments and statistics are in Table S5.
- (J) Percent survival of day 1 adult wild-type, *8rexΔ*, *2rexΔ*, and *6rexΔ* hermaphrodites in 0.2 M paraquat to induce reactive oxygen species in mitochondria. Wild-type worms subjected to *daf-2* RNAi were used as a control for increased oxidative stress tolerance. For each genotype, the average  $\pm$  SEM of at least three replicates is plotted.

**Table S1. Locations of *rex* site deletions and insertions, Related to Figure 1; Figure 2**

| <i>rex</i> site | Deletion location      | Deletion size | Genomic location | Distance to nearest protein-coding gene           | Cas9 guide RNA target sequence (protospacer)    |
|-----------------|------------------------|---------------|------------------|---------------------------------------------------|-------------------------------------------------|
| <i>rex-32</i>   | X:2996734 to 2997626   | 892 bp        | intergenic       | 677 bp<br><i>Y41G9A.6</i>                         | constructed using TALENs Lo et al., 2013        |
| <i>rex-33</i>   | X:6296494 to 6297792   | 1298 bp       | genic            | last intron of <i>mom-1</i> (Thorpe et al., 1997) | ccatttacattggcgcagg and taacttattttacagaaaac    |
| <i>rex-14</i>   | X:8035969 to 8037090   | 1121 bp       | intergenic       | 423 bp<br><i>xol-1</i>                            | atccacattactgtggttg and ccttcacaacactcttttc     |
| <i>rex-47</i>   | X:9465542 to 9465960   | 418 bp        | intergenic       | 817 bp<br><i>ZK899.6</i>                          | gtagtcacaccgaattgata<br>Crane et al., 2015      |
| <i>rex-8</i>    | X:11093785 to 11094686 | 901 bp        | intergenic       | 2395 bp<br><i>W02H3.3</i>                         | agttgaaacacccatggagcgg and gcaacttatcgggtgcgcgg |
| <i>rex-43</i>   | X:13700642 to 13701123 | 481 bp        | intergenic       | 4842 bp<br><i>adm-2</i>                           | ttggattgtgtcatcgttg and aatgtcattaggttaaag      |
| <i>rex-48</i>   | X:14525672 to 14526080 | 408 bp        | intergenic       | 491 bp<br><i>nspc-17</i>                          | ccagcattttgagtgctt                              |
| <i>rex-35</i>   | X:16681790 to 16682252 | 462 bp        | intergenic       | 1967 bp<br><i>F22H10.2</i>                        | ctatatacatgtttgaaac and tgttattctatttctaaag     |

  

| <i>rex</i> site | Insertion location | Insertion size | Inserted sequence      | Distance to nearest protein-coding gene | Cas9 guide RNA target sequence (protospacer) |
|-----------------|--------------------|----------------|------------------------|-----------------------------------------|----------------------------------------------|
| <i>rex-32</i>   | X:7812122          | 592 bp         | X:2996832 to 2997424   | 2988 bp<br><i>R03G5.6</i>               | gtagaatgctccgtgtatgg                         |
| <i>rex-8</i>    | X:9198531          | 754 bp         | X:11093928 to 11094681 | 4149 bp<br><i>Y81B9A.1</i>              | agtggactccatcacactgg                         |
| <i>rex-14</i>   | I:5448650          | 500 bp         | X:8036158 to 8036657   | 1795 bp<br><i>F27C1.13</i>              | atttactgccaacaggggg                          |
| <i>rex-47</i>   | I:6858675          | 419 bp         | X:9465601 to 9466019   | 1146 bp<br><i>glh-1</i>                 | ttccaaatcaggccgtaggg                         |
| <i>rex-8</i>    | I:8507023          | 796 bp         | X:11093891 to 11094686 | 2018 bp<br><i>sec-22</i>                | cgtggtagtggtagaagcgg                         |
| <i>rex-32</i>   | X:15574677         | 592 bp         | X:2996832 to 2997424   | 984 bp<br><i>dyn-1</i>                  | ttatgtagtctcttcagtg                          |

The genes nearest each deleted *rex* site do not show significant expression changes in *8rexΔ* compared to wild-type embryos (all q values > 0.99 and fold changes < 2).

**Table S2. Statistics for Hi-C libraries, related to Figure 1; Figure 2; Figure S2; Figure S4.**

| Genotype                                                            | sequencing ID | Read pairs sequenced | Mapped paired-end reads | Hi-C contacts | cis contacts | % cis contacts | contacts ≤20kb | contacts >20kb | trans contacts |
|---------------------------------------------------------------------|---------------|----------------------|-------------------------|---------------|--------------|----------------|----------------|----------------|----------------|
| Wild type, replicate 1                                              | BMEA008       | 345,019,879          | 282,509,400             | 165,106,057   | 108,180,356  | 65.5           | 18,537,295     | 89,643,061     | 56,925,701     |
| Wild type, replicate 2                                              | BMQB011       | 347,282,747          | 285,963,877             | 174,488,311   | 120,023,946  | 68.8           | 19,440,906     | 100,583,040    | 54,464,365     |
| DCC mutant, replicate 1                                             | BMEA014       | 343,219,970          | 282,454,019             | 212,570,004   | 162,743,891  | 76.6           | 28,524,650     | 134,219,241    | 49,826,113     |
| DCC mutant, replicate 2                                             | BMEA015       | 335,462,364          | 275,027,515             | 226,964,909   | 172,371,804  | 75.9           | 29,473,750     | 142,898,054    | 54,593,105     |
| <i>rex-47Δ</i> , replicate 1                                        | BMEA007       | 294,081,104          | 243,068,670             | 153,945,373   | 125,150,766  | 81.3           | 28,931,142     | 96,219,624     | 28,794,607     |
| <i>rex-47Δ</i> , replicate 2                                        | BMEA009       | 338,247,895          | 276,996,740             | 165,220,501   | 110,622,381  | 67.0           | 17,894,594     | 92,727,787     | 54,598,120     |
| <i>3rexΔ</i>                                                        | BMEA027       | 318,171,138          | 258,390,604             | 148,851,059   | 118,655,892  | 79.7           | 27,718,268     | 90,937,624     | 30,195,167     |
| <i>6rexΔ</i> , replicate 1                                          | BMEA005       | 357,347,563          | 295,322,718             | 104,132,475   | 71,384,861   | 68.6           | 13,393,596     | 57,991,265     | 32,747,614     |
| <i>6rexΔ</i> , replicate 2                                          | BMEA010       | 346,012,880          | 283,577,018             | 156,033,638   | 107,310,063  | 68.8           | 19,405,386     | 87,904,677     | 48,723,575     |
| <i>8rexΔ</i> , replicate 1                                          | BMEA011       | 332,906,702          | 279,292,784             | 122,811,741   | 109,070,728  | 88.8           | 31,604,873     | 77,465,855     | 13,741,013     |
| <i>8rexΔ</i> , replicate 2                                          | BMEA012       | 321,206,155          | 263,925,332             | 174,496,009   | 138,646,425  | 79.5           | 37,428,958     | 101,217,467    | 35,849,584     |
| <i>8rexΔ</i> plus <i>rex-32</i>                                     | BMEA034       | 289,222,774          | 238,607,345             | 147,738,802   | 123,184,375  | 83.4           | 30,757,996     | 92,426,379     | 24,554,427     |
| <i>8rexΔ</i> plus <i>rex-32</i> & <i>rex-8</i>                      | BMEA038       | 312,384,765          | 254,262,569             | 179,289,194   | 122,937,082  | 68.6           | 16,183,574     | 106,753,508    | 56,352,112     |
| <i>rex-32</i> insert                                                | BMAS001       | 340,895,823          | 273,682,301             | 204,321,406   | 158,275,799  | 77.5           | 25,154,746     | 133,121,053    | 46,045,607     |
| <i>3rexΔ</i> plus <i>rex-47</i> on I                                | BMEA028       | 291,839,702          | 236,564,530             | 132,176,851   | 107,531,507  | 81.4           | 25,669,424     | 81,862,083     | 24,645,344     |
| <i>3rexΔ</i> plus <i>rex-47</i> & <i>rex-8</i> on I                 | BMEA029       | 330,676,073          | 279,160,255             | 132,500,704   | 110,416,797  | 83.3           | 26,804,337     | 83,612,460     | 22,083,907     |
| <i>3rexΔ</i> plus <i>rex-14</i> , <i>rex-47</i> & <i>rex-8</i> on I | BMEA035       | 295,667,838          | 240,271,869             | 147,744,551   | 113,255,151  | 76.7           | 28,417,402     | 84,837,749     | 34,489,400     |

For each Hi-C experiment, the table gives the total number of paired end reads, the number of pairs for which both ends mapped, the number of valid Hi-C contacts after filtering (as in Brejc et al., 2017, Imakaev et al., 2012), and the number of contacts between pairs of loci on the same chromosome (within 20 kb or greater than 20 kb) and on different chromosomes.

**Table S3. Wild-type and *8rexΔ* hermaphrodites have similar brood sizes and viability, Related to Figure 3**

| Genotype       | Total embryos | Total adults | Broods counted | Viability | Average Brood Size | Brood Size Standard Deviation |
|----------------|---------------|--------------|----------------|-----------|--------------------|-------------------------------|
| <b>Trial 1</b> |               |              |                |           |                    |                               |
| WT             | 2572          | 2593         | 10             | 1.01      | 257                | 37                            |
| <i>8rexΔ</i>   | 2256          | 2310         | 9              | 1.02      | 251                | 27                            |
| <b>Trial 2</b> |               |              |                |           |                    |                               |
| WT             |               | 2798         | 9              |           | 311                | 53                            |
| <i>8rexΔ</i>   |               | 2685         | 9              |           | 298                | 36                            |
| <b>Trial 3</b> |               |              |                |           |                    |                               |
| WT             |               | 2980         | 9              |           | 331                | 29                            |
| <i>8rexΔ</i>   |               | 3115         | 10             |           | 312                | 29                            |

Wild-type and *8rexΔ* brood sizes are not significantly different (Trial 1  $p = 0.87$ , Trial 2  $p = 0.56$ , Trial 3  $p = 0.16$ , two-tailed t test).

**Table S4. *8rexΔ*, *2rexΔ*, and *6rexΔ* have significantly lower thermotolerance than wild-type adults, Related to Figure 5**

| Trial (hours at 37°C)                          | Percent alive after 37°C heat stress |              |              |              |
|------------------------------------------------|--------------------------------------|--------------|--------------|--------------|
|                                                | WT                                   | <i>8rexΔ</i> | <i>2rexΔ</i> | <i>6rexΔ</i> |
| Trial 1 (5 hr)                                 | 82%                                  | 68%          |              |              |
| Trial 2 (7 hr)                                 | 74%                                  | 46%          |              |              |
| Trial 3 (7 hr)                                 | 49%                                  | 30%          |              |              |
| Trial 4 (7 hr)                                 | 88%                                  | 54%          |              |              |
| Trial 5 (7 hr)                                 | 53%                                  | 37%          |              |              |
| Trial 6 (7 hr)                                 | 43%                                  | 34%          |              |              |
| Trial 7 (6 hr)                                 | 83%                                  | 76%          | 68%          | 57%          |
| Trial 8 (6 hr)                                 | 38%                                  | 28%          | 36%          | 31%          |
| Trial 9 (7 hr)                                 | 27%                                  | 30%          | 14%          | 24%          |
| Trial 10 (7 hr)                                | 31%                                  | 30%          | 21%          | 25%          |
| Trial 11 (7 hr)                                | 89%                                  | 80%          | 69%          | 68%          |
| Trial 12 (7 hr)                                | 76%                                  | 31%          | 34%          | 68%          |
| Trial 13 (7 hr)                                | 63%                                  | 40%          | 53%          | 44%          |
| Trial 14 (7 hr)                                | 92%                                  | 62%          | 76%          | 63%          |
| Trial 15 (9.5 hr)                              | 70%                                  | 34%          | 63%          | 33%          |
| p value compared to WT (all Trials)            | -                                    | 0.0001       | 0.0043       | 0.0024       |
| p value compared to <i>8rexΔ</i> (all Trials)  | 0.0001                               | -            | 0.6175       | 0.9671       |
| p value compared to <i>2rexΔ</i> (all Trials)  | 0.0043                               | 0.6175       | -            | 0.7036       |
| p value compared to WT (7 hr Trials)           | -                                    | 0.0014       | 0.0135       | 0.0183       |
| p value compared to <i>8rexΔ</i> (7 hr Trials) | 0.0014                               | -            | 0.8564       | 0.6761       |
| p value compared to <i>2rexΔ</i> (7 hr Trials) | 0.0135                               | 0.8564       | -            | 0.571        |

Sensitivity to heat stress was assessed by counting the percentage of day 1 adults that survive at 37°C for the indicated number of hours. P values were calculated using a two-tailed paired t test. WT, wild type

**Table S5. Wild-type, *8rexΔ*, *2rexΔ*, and *6rexΔ* hermaphrodites have similar tunicamycin sensitivity, Related to Figure 5**

| Genotype                 | Median Lifespan (Days) | Worms counted | Total Worms | P value compared to WT with tunicamycin | P value compared to <i>8rexΔ</i> with tunicamycin | P value compared to WT without tunicamycin |
|--------------------------|------------------------|---------------|-------------|-----------------------------------------|---------------------------------------------------|--------------------------------------------|
| <b>Trial 1</b>           |                        |               |             |                                         |                                                   |                                            |
| WT                       | 19                     | 96            | 120         | < 0.0001                                | < 0.0001                                          |                                            |
| <i>8rexΔ</i>             | 17                     | 94            | 120         | < 0.0001                                | < 0.0001                                          | 0.0004                                     |
| WT tunicamycin           | 13                     | 98            | 120         |                                         | 0.2939                                            | < 0.0001                                   |
| <i>8rexΔ</i> tunicamycin | 12                     | 102           | 120         | 0.2939                                  |                                                   | < 0.0001                                   |
| <b>Trial 2</b>           |                        |               |             |                                         |                                                   |                                            |
| WT                       | 24                     | 92            | 120         | < 0.0001                                | 0.3192                                            |                                            |
| <i>8rexΔ</i>             | 20                     | 84            | 120         | 0.3192                                  | < 0.0001                                          | < 0.0001                                   |
| WT tunicamycin           | 19                     | 110           | 120         |                                         | < 0.0001                                          | < 0.0001                                   |
| <i>8rexΔ</i> tunicamycin | 19                     | 105           | 120         | < 0.0001                                |                                                   | < 0.0001                                   |
| <b>Trial 3</b>           |                        |               |             |                                         |                                                   |                                            |
| WT tunicamycin           | 12                     | 103           | 120         |                                         | 0.0002                                            | < 0.0001                                   |
| <i>8rexΔ</i> tunicamycin | 12                     | 106           | 120         | 0.0002                                  |                                                   | < 0.0001                                   |
| <i>2rexΔ</i> tunicamycin | 11                     | 109           | 120         | < 0.0001                                | 0.0188                                            | < 0.0001                                   |
| <i>6rexΔ</i> tunicamycin | 12                     | 109           | 120         | 0.338                                   | 0.002                                             | < 0.0001                                   |
| WT                       | 22                     | 100           | 120         | < 0.0001                                | < 0.0001                                          |                                            |
| <i>8rexΔ</i>             | 20                     | 97            | 120         | < 0.0001                                | < 0.0001                                          | 0.0018                                     |
| <i>2rexΔ</i>             | 20                     | 104           | 120         | < 0.0001                                | < 0.0001                                          | 0.001                                      |
| <i>6rexΔ</i>             | 22                     | 99            | 120         | < 0.0001                                | < 0.0001                                          | 0.9858                                     |
| <b>Trial 4</b>           |                        |               |             |                                         |                                                   |                                            |
| WT tunicamycin           | 12                     | 101           | 120         |                                         | 0.0084                                            | < 0.0001                                   |
| <i>8rexΔ</i> tunicamycin | 11                     | 94            | 120         | 0.0084                                  |                                                   | < 0.0001                                   |
| <i>2rexΔ</i> tunicamycin | 12                     | 100           | 120         | 0.3653                                  | 0.0605                                            | < 0.0001                                   |
| <i>6rexΔ</i> tunicamycin | 12                     | 98            | 120         | 0.0086                                  | < 0.0001                                          | < 0.0001                                   |
| WT                       | 18                     | 101           | 120         | < 0.0001                                | < 0.0001                                          |                                            |
| <i>8rexΔ</i>             | 16                     | 94            | 120         | < 0.0001                                | < 0.0001                                          | < 0.0001                                   |
| <i>2rexΔ</i>             | 16                     | 100           | 120         | < 0.0001                                | < 0.0001                                          | < 0.0001                                   |
| <i>6rexΔ</i>             | 18                     | 98            | 120         | < 0.0001                                | < 0.0001                                          | 0.1227                                     |

Sensitivity to ER unfolded protein stress was assessed by measuring hermaphrodite lifespan on plates containing 20 ng/μl tunicamycin, which causes accumulation of unfolded glycoproteins in the ER. "Worms counted" is the number of worm deaths tallied. "Total worms" is the initial number of worms, including those that were censored from the experiment because they crawled off the plate. P values were calculated using the logrank test. Tunicamycin exposure reduced the lifespan of all genotypes. As in control experiments, lifespans of *8rexΔ* and *2rexΔ* adults on tunicamycin were shorter than those of wild-type and *6rexΔ* adults on tunicamycin. The degree of lifespan reduction was similar across all genotypes, indicating similar sensitivity to ER unfolded protein stress. WT, wild type.

**Table S6. Statistics for hermaphrodite and male lifespan experiments, Related to Figure 5**

| <b>Genotype</b>                      | <b>Median Lifespan (Days)</b> | <b>Worms counted</b> | <b>Total Worms</b> | <b>P value compared to WT</b> | <b>P value compared to <i>8rexΔ</i></b> |
|--------------------------------------|-------------------------------|----------------------|--------------------|-------------------------------|-----------------------------------------|
| <b>Hermaphrodite Trial 1</b>         |                               |                      |                    |                               |                                         |
| WT                                   | 21                            | 77                   | 108                |                               |                                         |
| <i>8rexΔ</i>                         | 17                            | 90                   | 120                | < 0.0001                      |                                         |
| <b>Hermaphrodite Trial 2</b>         |                               |                      |                    |                               |                                         |
| WT                                   | 23                            | 89                   | 120                |                               |                                         |
| <i>8rexΔ</i>                         | 19                            | 102                  | 120                | < 0.0001                      |                                         |
| <i>rex-32Δ rex-33Δ</i>               | 19                            | 88                   | 120                | < 0.0001                      |                                         |
| <i>rex-32Δ</i>                       | 21                            | 98                   | 120                | 0.055                         | 0.0226                                  |
| <i>rex-33Δ</i>                       | 21                            | 100                  | 120                | 0.0304                        | 0.0196                                  |
| <i>8rexΔ plus rex-32 &amp; rex-8</i> | 19                            | 103                  | 120                | < 0.0001                      | 0.02218                                 |
| <b>Hermaphrodite Trial 3</b>         |                               |                      |                    |                               |                                         |
| WT                                   | 21                            | 78                   | 120                |                               |                                         |
| <i>8rexΔ</i>                         | 17                            | 100                  | 120                | < 0.0001                      |                                         |
| <i>6rexΔ</i>                         | 21                            | 92                   | 120                | 0.7959                        | < 0.0001                                |
| <i>rex-32Δ rex-33Δ</i>               | 17                            | 109                  | 120                | < 0.0001                      | 0.0632                                  |
| <b>Hermaphrodite Trial 4</b>         |                               |                      |                    |                               |                                         |
| WT                                   | 20                            | 92                   | 120                |                               |                                         |
| <i>6rexΔ</i>                         | 18                            | 88                   | 120                | 0.1974                        |                                         |
| <i>rex-32Δ</i>                       | 18                            | 78                   | 120                | 0.189                         |                                         |
| <i>rex-33Δ</i>                       | 20                            | 93                   | 120                | 0.5062                        |                                         |
| <b>Male Trial 1</b>                  |                               |                      |                    |                               |                                         |
| WT males                             | 14                            | 169                  | 300                |                               |                                         |
| <i>8rexΔ</i> males                   | 14                            | 133                  | 300                | 0.2485                        |                                         |
| <b>Male Trial 2</b>                  |                               |                      |                    |                               |                                         |
| WT males                             | 18                            | 146                  | 310                |                               |                                         |
| <i>8rexΔ</i> males                   | 16                            | 89                   | 300                | 0.0633                        |                                         |

“Worms counted” is the number of worm deaths tallied. “Total worms” is the initial number of worms, including those that were censored from the experiment because they crawled off the plate. As observed previously, the majority of males crawled off the plate before dying. P values were calculated using the logrank test. WT, wild type
